# Supplementary material for: Functional Prediction of trans-Prenyltransferases Reveals the Distribution of GFPPSs in Species beyond the Brassicaceae Clade
Source: MDPI journal article supplement (doi:10.3390/ijms23169471), 2022-08-22
Supplement: s1 [file s1]

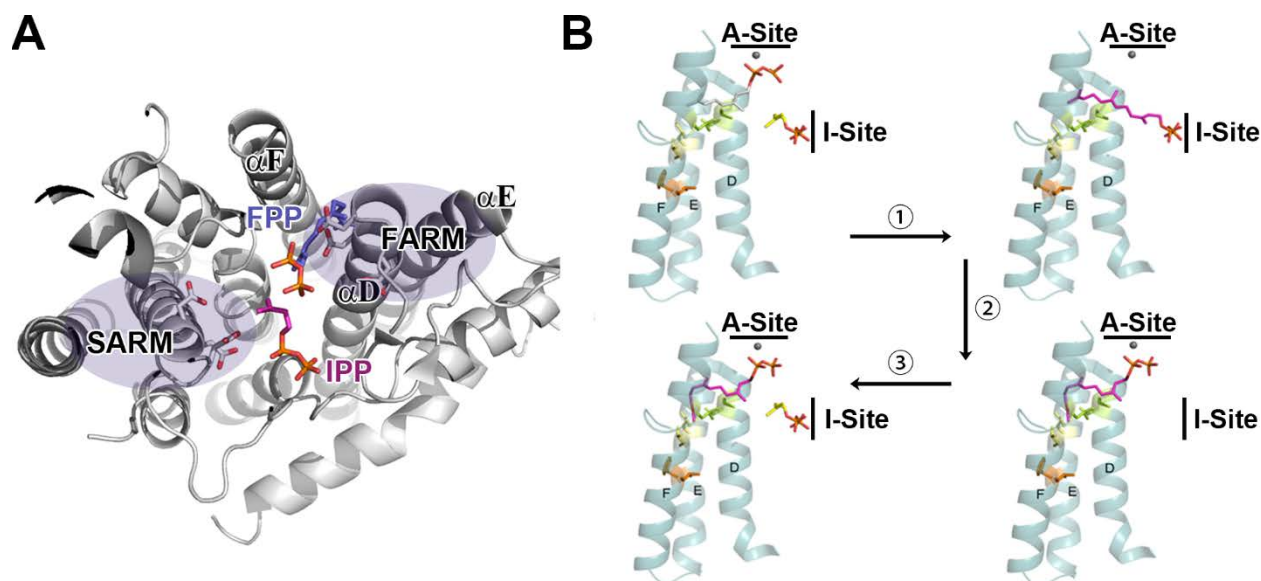

**Figure S1 The overall structure and reaction mechanism of *trans*-PTs.** (A) Overall structure of an ArGFPPS2 monomer (top view). The structural cartoon is colored in grey. The FARM and SARM motifs, the IPP in I-site, the FPP in A site, and the product elongation pocket are indicated. (B) The mechanism of condensation reactions. The substrates IPP, GPP and FPP are shown with sticks and colored in yellow, grey and magenta, respectively.

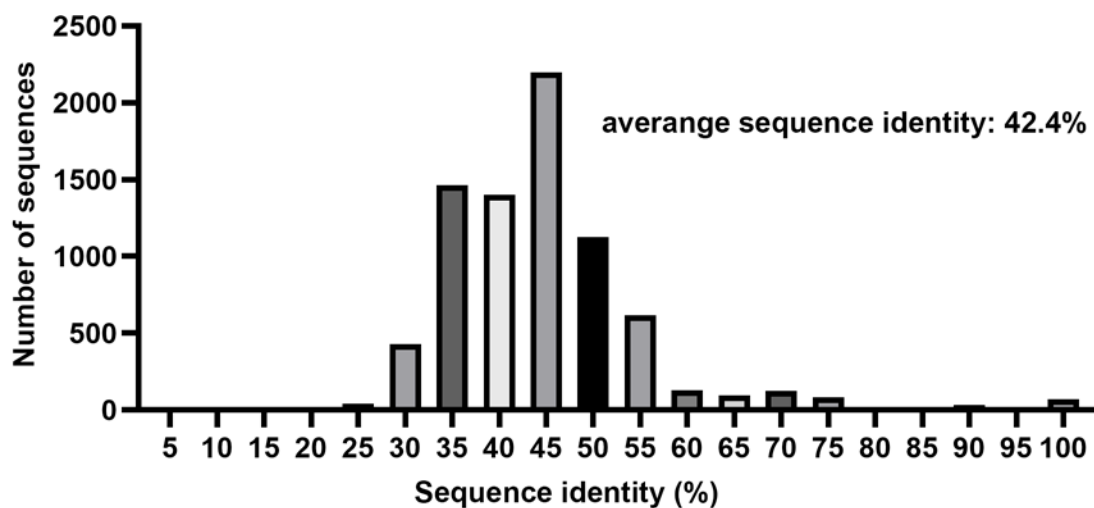

**Figure S2 The distribution of sequence identity in the *trans*-PTs dataset.** Each of the 7,870 *trans*-PTs was aligned with all the searching templates and the highest sequence identity was

taken into the calculation of the distribution. The average sequence identity of the whole dataset is also shown in the chat.

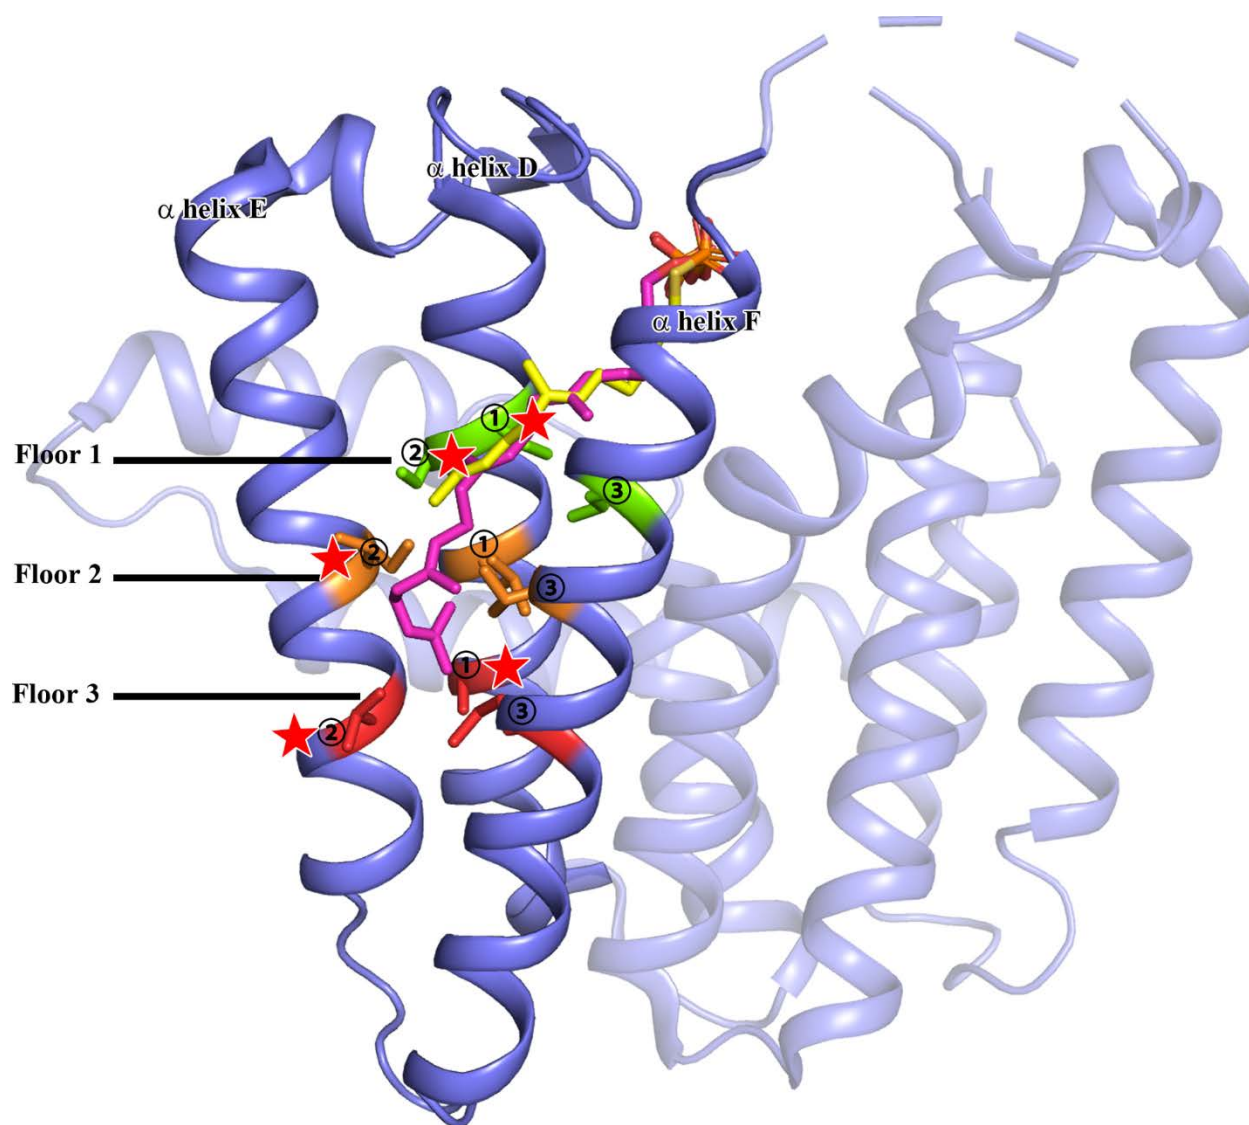

**Figure S3. The proposed products' chain elongation route in *trans*-PTs.** The “products’ chain elongation route” is illustrated using ArGGPPS11. A proposed GGPP model is shown with sticks and colored in magenta. The experimentally determined substrate FPP (yellow sticks) is also modeled into the structure using 3WJN. The three “floor” residues are highlighted with sticks and colored in green, orange and red, respectively. The “floor” residues with higher weight in the final “blocking” score are marked with red stars.

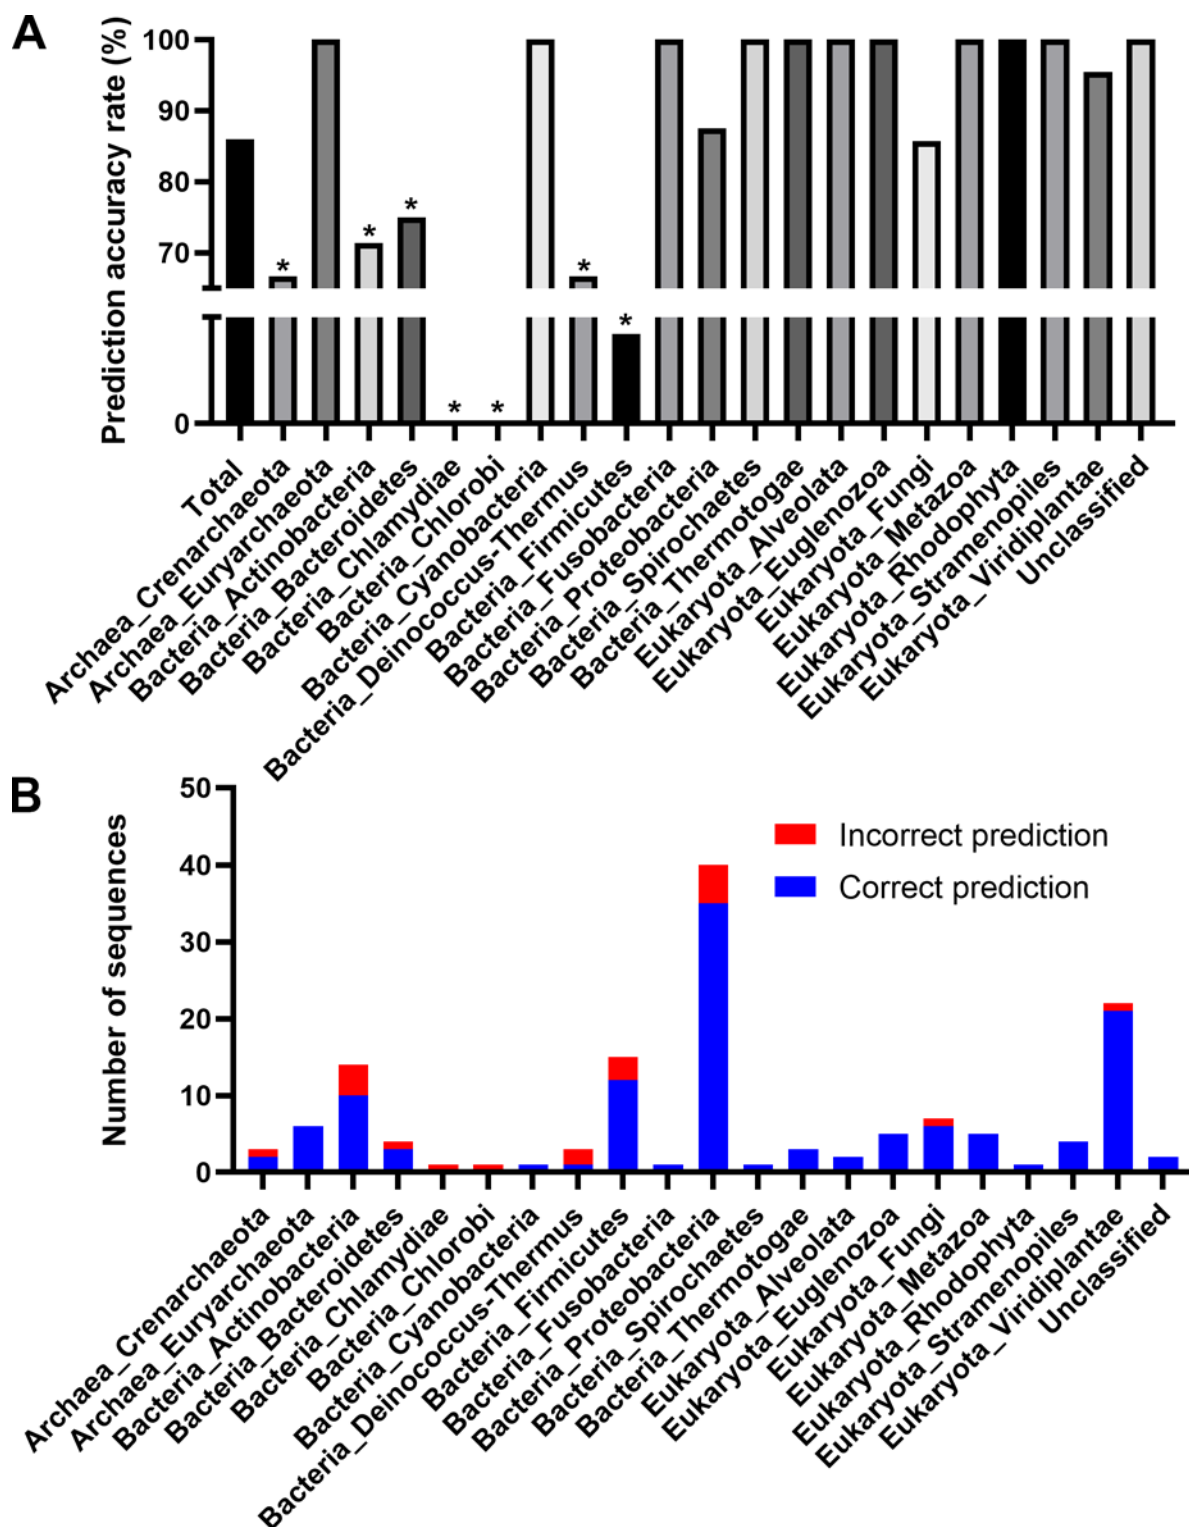

**Figure S4. Prediction results for the 141 experimentally determined *trans*-PTs. (A)**

Comparison of prediction accuracy by different species. Panels with comparatively higher or

lower accuracy are marked with asterisks. **(B)** The distribution of incorrect and correct prediction results in different species.

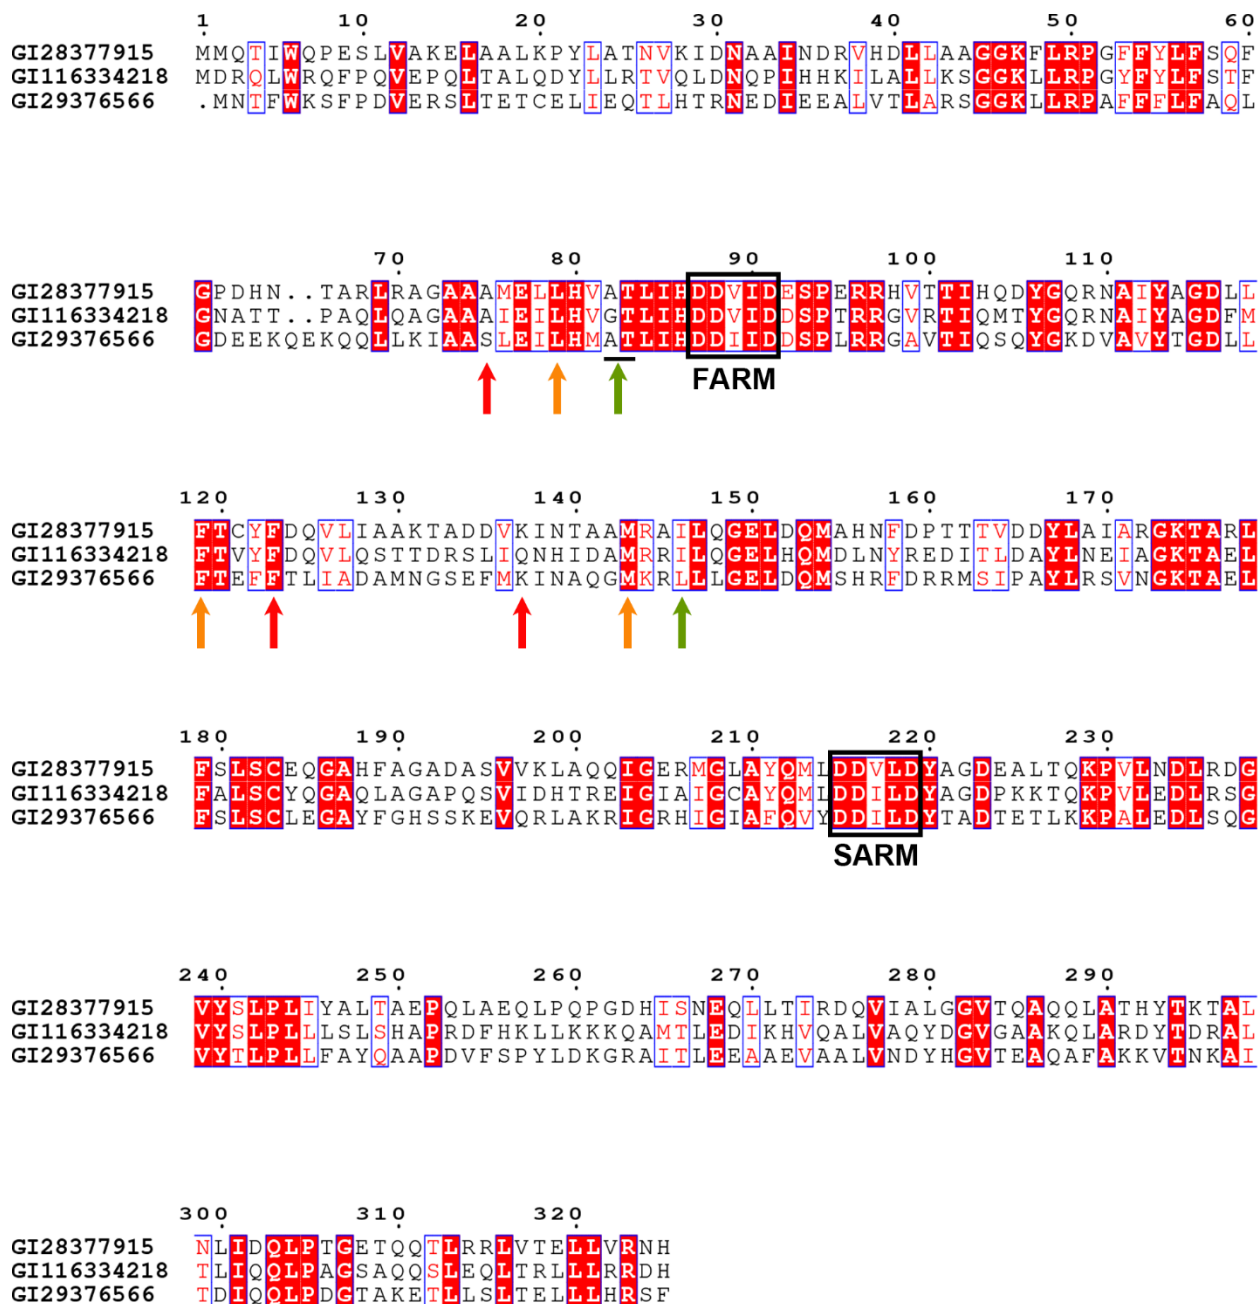

**Figure S5. Sequence alignment of three proteins using 3PKO as template.** The residues constituting the product elongation pocket helices and three floors are aligned. Invariant residues are highlighted in red, and conserved amino acids are boxed. The FARM and SARM motifs are



marked with black rectangular. The floor 1, 2 and 3 residues are indicated by green, orange, and red arrows, respectively.

Tree scale: 0.1

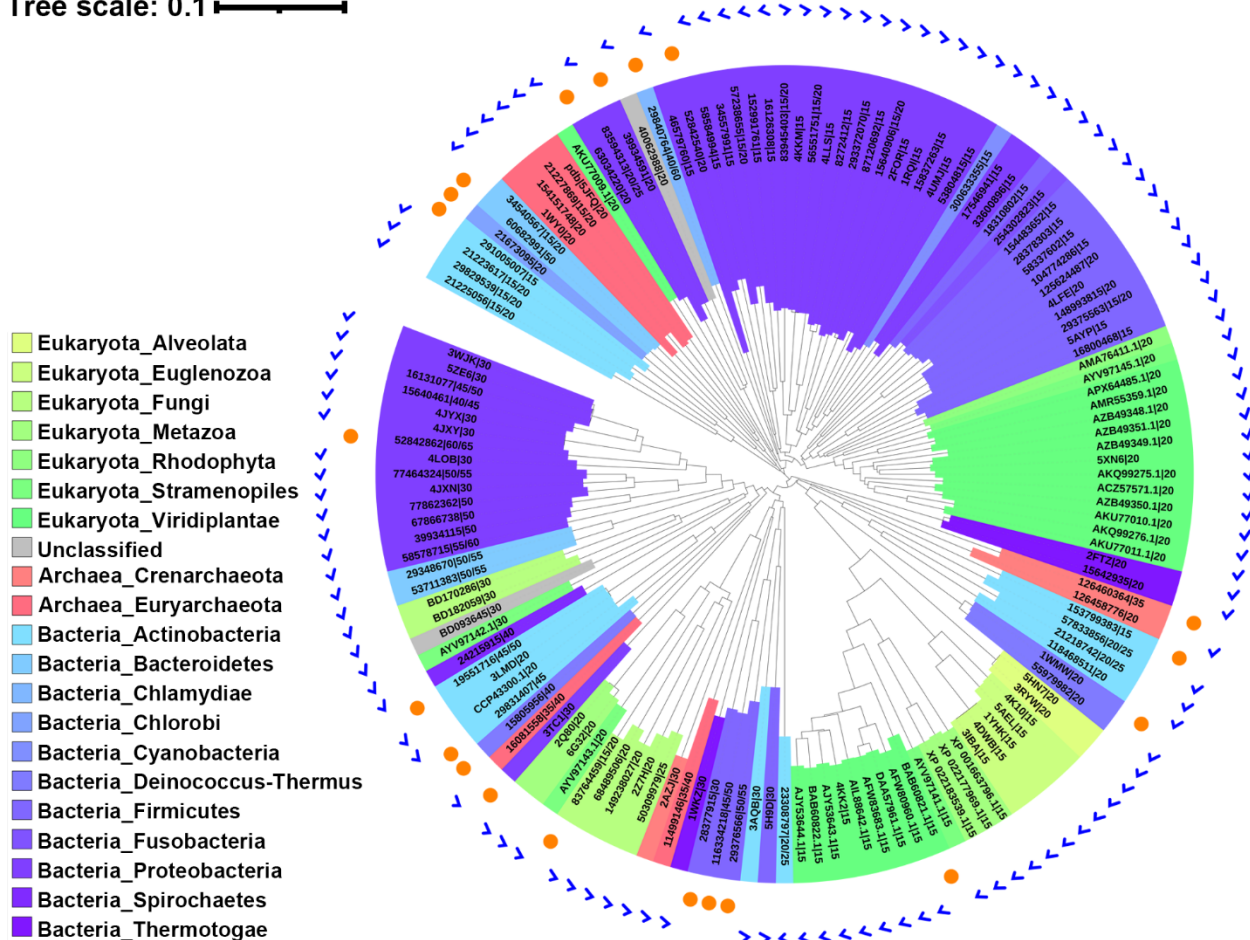

**Figure S6 Phylogenetic analysis of the prediction results in different species. 141**

experimentally determined *trans*-PTs protein sequences were used in constructing the neighbor-joining phylogenetic tree. The incorrectly and correctly predicted cases are marked as orange circles and blue checkmark, respectively.

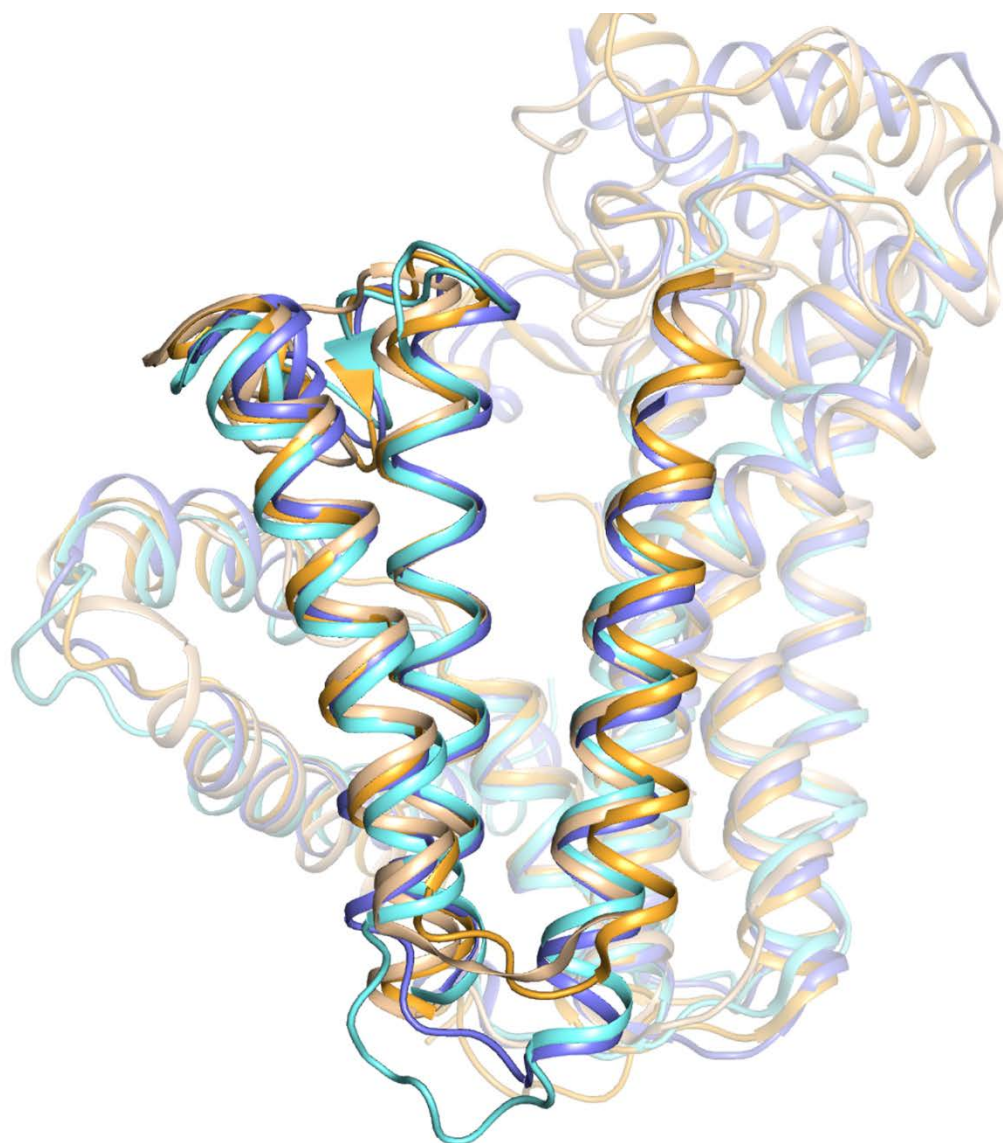

**Figure S7 Superimposition of *trans*-PTs structures.** Four *trans*-PTs structures (PDB IDs: 5H9D, 1WKZ, 1WY0, and 5E8L) are superimposed. The structures are shown with ribbons, and are colored in cyan (5E8L), orange (5H9D), wheat (1WKZ), and light blue (1WY0), respectively. The elongation tunnel is highlighted with other parts of the structures shown in transparent.

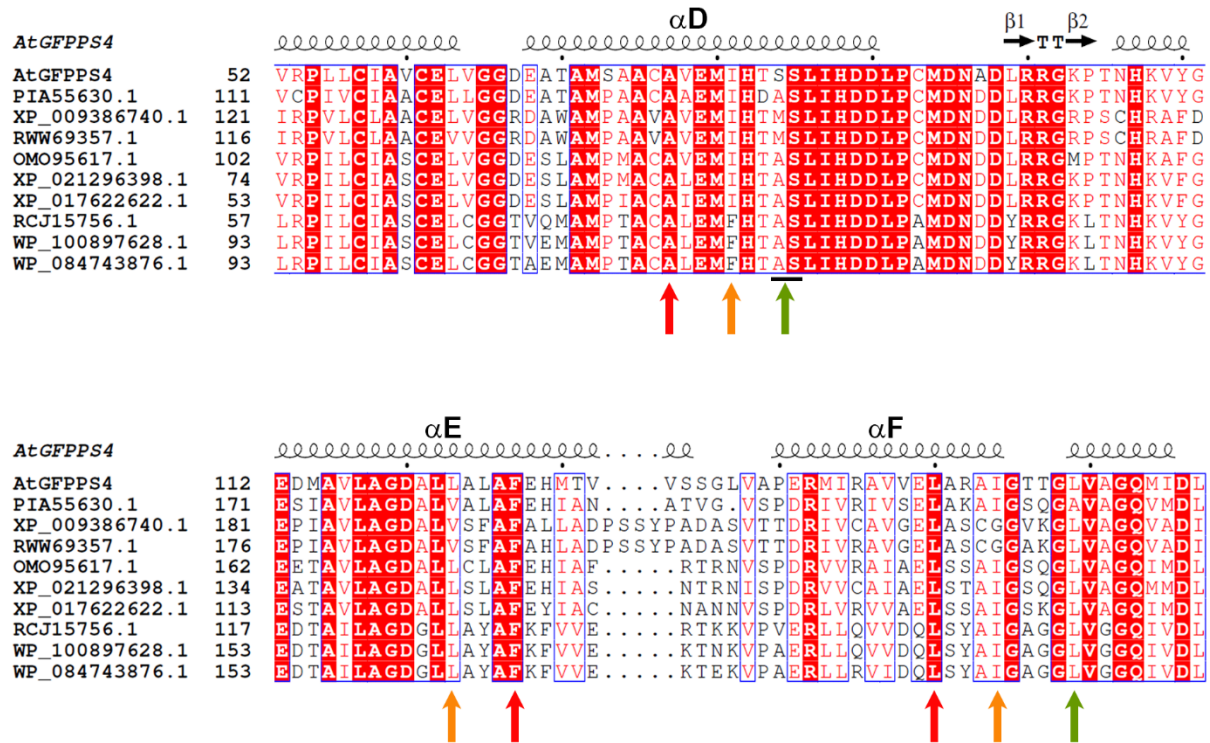

**Figure S8. Comparison of “floor” residues in predicted and identified GFPPSs.** The residues constituting the product elongation pocket helices and three floors are aligned. Invariant residues are highlighted in red, and conserved amino acids are boxed. The secondary structural elements of *AtGFPPS4* are shown above the aligned sequences. The floor 1, 2 and 3 residues are indicated by green, orange, and red arrows, respectively.

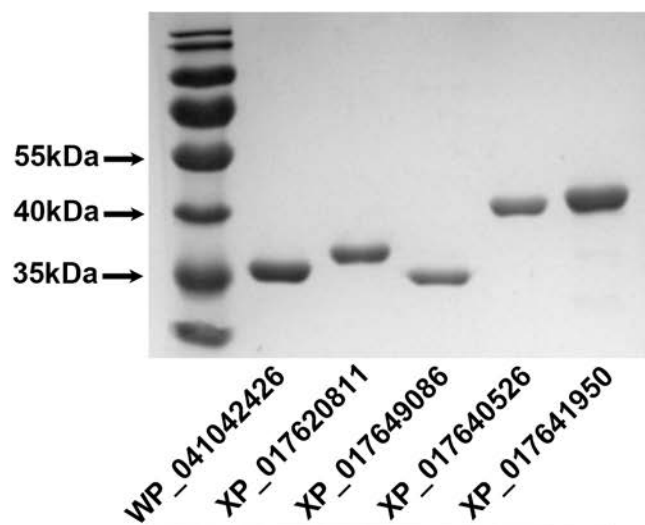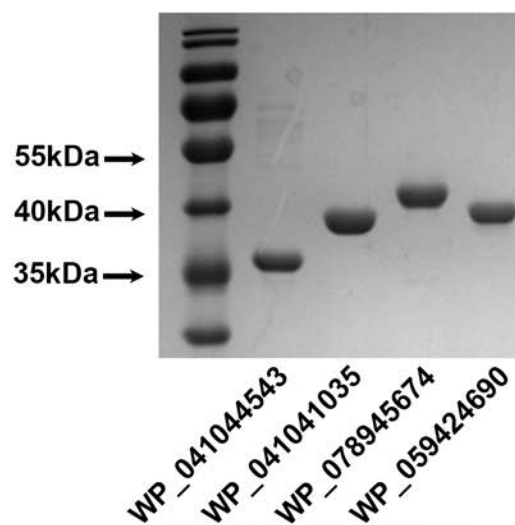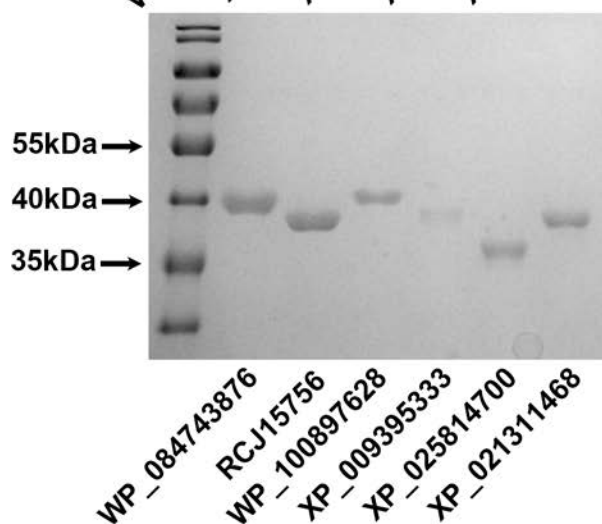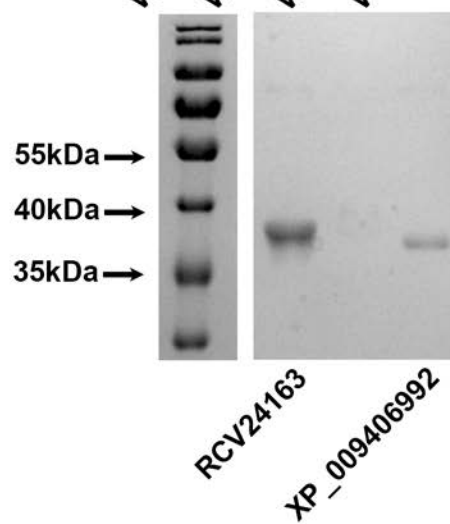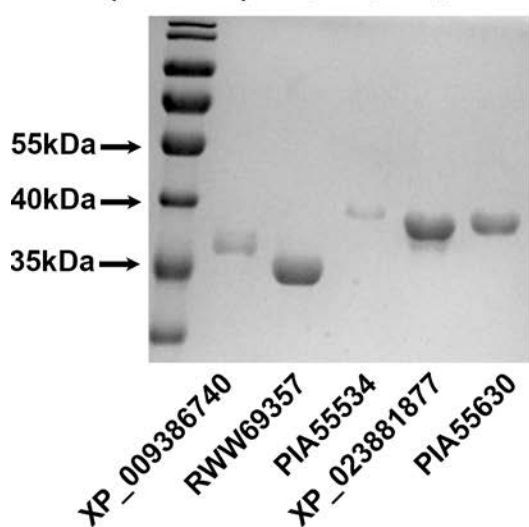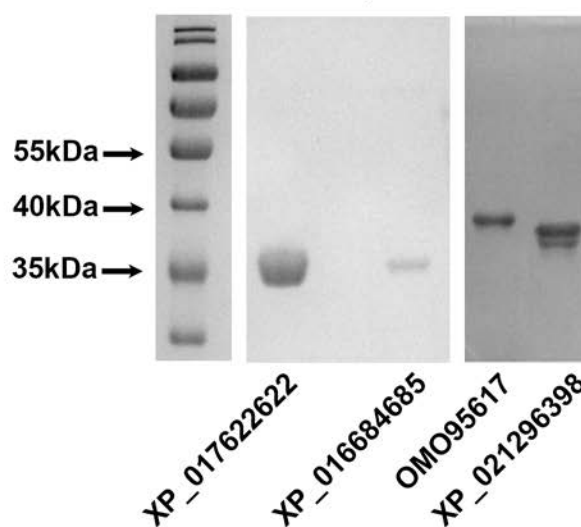



**Figure S9. The expression and purification of predicted GFPPs.** SDS-page gels show the purified proteins in different panels. The molecular weights are indicated by the protein markers. The 55 kDa, 40 kDa, 35 kDa bands of the marker are pointed by black arrows and labels.

**Table S1. The “blocking score” for each amino acid.**

| Amino acid | “Blocking score” | Amino acid | “Blocking score” | Amino acid | “Blocking score” |
|------------|------------------|------------|------------------|------------|------------------|
| Ala        | 105.27           | Arg        | 146.71           | Asn        | 120.11           |
| Asp        | 120.58           | Cys        | 108.69           | Glu        | 132.12           |
| Gln        | 135.4            | Gly        | 100.33           | His        | 140.57           |
| Ile        | 121.04           | Leu        | 121.33           | Lys        | 129.88           |
| Met        | 126.38           | Phe        | 142.42           | Pro        | 109.14           |
| Ser        | 108.64           | Thr        | 108.01           | Trp        | 171.16           |
| Tyr        | 148.79           | Val        | 111.88           |            |                  |

**Table S2. The weighting factors for each site of “floor” residues.**

|                | Site_1<br>(Percentage for final blocking score of “floor”) | Site_2<br>(Percentage for final blocking score of “floor”) | Site_3<br>(Percentage for final blocking score of “floor”) |
|----------------|------------------------------------------------------------|------------------------------------------------------------|------------------------------------------------------------|
| “First floor”  | 0.7061 (48.7%)                                             | 0.7274 (50.2%)                                             | 0.0152 (1.1%)                                              |
| “Second floor” | 0.1288 (20.0%)                                             | 0.3566 (55.3%)                                             | 0.1592 (24.7%)                                             |
| “Third floor”  | 0.5476 (36.5%)                                             | 0.9449 (62.9%)                                             | 0.0089 (0.6%)                                              |

**Table S3. Experimentally determined product chain length of *trans*-PTs sequences from MD-Pre testing dataset.**

| GI        | Experiment | Detection methods | MD-Pre predicted | PTS-Pre predicted |
|-----------|------------|-------------------|------------------|-------------------|
| 77862362  | C50/C55    | TLC               | C25              | ≥C30              |
| 293372070 | C15        | TLC               | C15              | C15               |
| 19551716  | C45/C50    | TLC               | C25              | C20/C25           |
| 21225056  | C15/C20    | TLC               | C20              | C15               |
| 15640906  | C15/C20    | TLC               | C15              | C15               |
| 29375563  | C15/C20    | TLC               | C15              | C15               |
| 52842540  | C20        | TLC               | C20              | C15               |
| 57238655  | C15/C20    | TLC               | C20              | C15               |
| 116334218 | C45/C50    | TLC               | ≥C30             | C20               |

|           |         |     |      |         |
|-----------|---------|-----|------|---------|
| 8272412   | C15     | TLC | C15  | C15     |
| 77464324  | C50/C55 | TLC | C25  | ≥C30    |
| 67866738  | C50     | TLC | C25  | ≥C30    |
| 39934115  | C50     | TLC | C25  | ≥C30    |
| 125624487 | C20     | TLC | C20  | C20     |
| 16126308  | C15     | TLC | C20  | C15     |
| 118468511 | C20     | TLC | C20  | C20     |
| 148993815 | C20     | TLC | C20  | C20     |
| 16131077  | C45/C50 | TLC | C25  | ≥C30    |
| 15640461  | C40/C45 | TLC | C20  | ≥C30    |
| 104774286 | C15     | TLC | C15  | C15     |
| 21223617  | C15/C20 | TLC | C25  | C15     |
| 29376566  | C50/C55 | TLC | C25  | C20     |
| 52842862  | C60/C65 | TLC | C25  | C20     |
| 21227869  | C15/C20 | TLC | C25  | C20     |
| 21218742  | C20/C25 | TLC | C20  | C20     |
| 58337602  | C15     | TLC | C15  | C15     |
| 34540567  | C15/C20 | TLC | C15  | C15     |
| 57833856  | C20/C25 | TLC | C25  | C20     |
| 60682991  | C50     | TLC | C15  | C20     |
| 29348670  | C50/C55 | TLC | C25  | ≥C30    |
| 153799383 | C15     | TLC | ≥C30 | ≥C30    |
| 39934591  | C20     | TLC | C20  | C25     |
| 53711383  | C50/C55 | TLC | ≥C30 | ≥C30    |
| 23308797  | C20/C25 | TLC | C15  | C15/C20 |
| 53804815  | C15     | TLC | C15  | C15     |
| 18310802  | C15     | TLC | C15  | C15     |
| 55979982  | C20     | TLC | C15  | C20     |
| 15642935  | C20     | TLC | C20  | C20     |
| 34557991  | C15     | TLC | C15  | C15     |
| 28378303  | C15     | TLC | C15  | C15     |
| 15837263  | C15     | TLC | C15  | C15     |
| 87120692  | C15     | TLC | C15  | C15     |
| 28377915  | C30     | TLC | C20  | C20     |
| 33600896  | C15     | TLC | C20  | C15     |
| 291005007 | C15     | TLC | C20  | C20     |
| 152991761 | C15     | TLC | C15  | C15     |
| 300633355 | C15     | TLC | C20  | C15     |
| 17546941  | C15     | TLC | C15  | C15     |
| 29831407  | C45     | TLC | ≥C30 | C20     |
| 46579760  | C15     | TLC | C15  | C15     |
| 56551751  | C15/C20 | TLC | C15  | C15     |
| 16800468  | C15     | TLC | C15  | C15     |
| 68489506  | C20     | TLC | C20  | C20     |
| 40062988  | C20     | TLC | C25  | C20     |
| 50309979  | C25     | TLC | C25  | C25     |

|           |         |     |     |         |
|-----------|---------|-----|-----|---------|
| 149238027 | C20     | TLC | C20 | C20     |
| 154483652 | C15     | TLC | C15 | C15     |
| 254302823 | C15     | TLC | C15 | C15     |
| 83945403  | C15/C20 | TLC | C20 | C15     |
| 63034220  | C20     | TLC | C20 | ≥C30    |
| 11499146  | C35/C40 | TLC | C25 | ≥C30    |
| 15805956  | C40     | TLC | C25 | C20     |
| 58578715  | C55/C60 | TLC | C25 | ≥C30    |
| 83764459  | C15/C20 | TLC | C25 | ≥C30    |
| 83594313  | C20/C25 | TLC | C20 | C25     |
| 154151748 | C20     | TLC | C25 | C20/C25 |
| 58584994  | C15     | TLC | C15 | C15     |
| 29829539  | C15/C20 | TLC | C20 | C15     |
| 21673095  | C20     | TLC | C20 | C15     |
| 16081558  | C35/C40 | TLC | C20 | ≥C30    |
| 29840764  | C40-C60 | TLC | C15 | C25     |
| 126458776 | C20     | TLC | C20 | C20     |
| 24215915  | C40     | TLC | C25 | ≥C30    |
| 126460364 | C35     | TLC | C25 | C20/C25 |

The incorrect predictions are highlighted with light-orange and the correct predictions are highlighted with light blue.

**Table S4. The number of predicted sequences by MD-Pre and PTS-Pre.**

|                              | PTS-Pre correctly predicted | PTS-Pre incorrectly predicted | Total |
|------------------------------|-----------------------------|-------------------------------|-------|
| MD-Pre correctly predicted   | 37                          | 6                             | 43    |
| MD-Pre incorrectly predicted | 20                          | 11                            | 31    |
| Total                        | 57                          | 17                            |       |

The incorrect predictions are highlighted with light-orange and the correct predictions are highlighted with light blue.

**Table S5. Experimentally determined product chain length of *trans*-PTs sequences by using different detecting methods.**

| Protein or PDB ID | Experiment | Detection methods | PTS-Pre predicted | Ref (Pubmed ID) |
|-------------------|------------|-------------------|-------------------|-----------------|
| APX64485.1        | C20        | HPLC-MS/MS        | C20               | 30137453        |
| CCP43300.1        | C20        | GC-MS             | C20               | 30301210        |
| BAB60822.1        | C15        | UPLC-MS/MS        | C15               | 28478108        |
| BAB60821.1        | C15        | UPLC-MS/MS        | C20               | 28478108        |
| ACZ57571.1        | C20        | GC-MS             | C20               | 24346420        |
| AZB49351.1        | C20        | GC-MS             | C20               | 30448883        |
| AZB49350.1        | C20        | GC-MS             | C20               | 30448883        |
| AZB49349.1        | C20        | GC-MS             | C20               | 30448883        |
| AZB49348.1        | C20        | GC-MS             | C20               | 30448883        |
| AKU77011.1        | C20        | GC-MS             | C20               | 26449416        |
| AKU77010.1        | C20        | GC-MS             | C20               | 26449416        |
| AKU77009.1        | C20        | GC-MS             | C20               | 26449416        |
| AKQ99276.1        | C20        | GC-MS             | C20               | 26449416        |
| AKQ99275.1        | C20        | GC-MS             | C20               | 26449416        |
| AMR55359.1        | C20        | $\beta$ -carotene | C20               | [37]            |
| BD170286          | $\geq$ C30 | HPLC              | $\geq$ C30        | 27837315        |
| BD093645          | $\geq$ C30 | HPLC              | $\geq$ C30        | 27837315        |
| BD182059          | $\geq$ C30 | HPLC              | $\geq$ C30        | 27837315        |
| AFW83683.1        | C15        | GC-MS             | C15               | 25680349        |
| DAA57961.1        | C15        | GC-MS             | C15               | 25680349        |
| AFW80960.1        | C15        | GC-MS             | C15               | 25680349        |
| AYV97141.1        | C15        | GC-MS             | C15               | 30394540        |
| AYV97142.1        | C25/C30    | GC-MS             | $\geq$ C30        | 30394540        |
| AYV97143.1        | C20        | GC-MS             | C20               | 30394540        |
| AYV97145.1        | C20        | GC-MS             | C20               | 30394540        |
| XP_022183539.1    | C15        | GC-MS             | C15               | 30569472        |
| XP_022177969.1    | C15        | GC-MS             | C15               | 30569472        |
| AJY53644.1        | C15        | GC-MS             | C15               | 25938487        |
| AJY53643.1        | C15        | GC-MS             | C15               | 25938487        |
| XP_001663796.1    | C15        | HPLC              | C15               | 26188328        |
| AIL88642.1        | C15        | HPLC-MS           | C15               | [38]            |
| AMA76411.1        | C20        | $\beta$ -carotene | C20               | [39]            |
| 1RQI              | C15        | TLC               | C15               | 32584028        |
| 1WKZ              | $\geq$ C30 | TLC               | $\geq$ C30        | 15984931        |
| 1WMW              | C20        | TLC               | C15               | 10192906        |
| 1YHK              | C15        | TLC               | C15               | 18096393        |
| 2FOR              | C15        | TLC               | C15               | 32584028        |
| 2FTZ              | C20        | GC-MS             | C20               | 25491272        |
| 1WY0              | C20        | GC-MS             | C20               | 30062607        |
| 2AZJ              | C30        | TLC               | C30               | 16291686        |
| 2Q80              | C20        | TLC               | C20               | 16698791        |
| 2Z7H              | C20        | HPLC              | C20               | 35077178        |
| 3IBA              | C15        | TLC               | C15               | 18096393        |
| 3LMD              | C20        | HPLC              | C20/C25           | 25181035        |

|      |      |          |         |          |
|------|------|----------|---------|----------|
| 3AQB | ≥C30 | TLC      | ≥C30    | 21068379 |
| 3TC1 | ≥C30 | TLC      | C20     | 24895191 |
| 3RYW | C20  | HPLC     | C15/C20 | 30275041 |
| 4DWB | C15  | TLC      | C15     | 18096393 |
| 4JYX | ≥C30 | TLC      | ≥C30    | 8765142  |
| 4JXY | ≥C30 | TLC      | ≥C30    | 8765142  |
| 4JXN | ≥C30 | TLC      | ≥C30    | 29191106 |
| 4KKM | C15  | TLC      | C15     | 33732763 |
| 4KK2 | C15  | TLC      | C15     | 33732763 |
| 4LFE | C20  | TLC      | C20     | 19690851 |
| 4LOB | ≥C30 | HPLC     | ≥C30    | 31354766 |
| 4LLS | C15  | HPLC     | C15     | 2676985  |
| 4K10 | C15  | TLC      | C15     | 17724033 |
| 3WJK | ≥C30 | TLC      | ≥C30    | 24895191 |
| 4UMJ | C15  | ESI-MS   | C15     | 25760619 |
| 5AEL | C15  | HPLC-MS  | C15     | 26392508 |
| 5HN7 | C20  | HPLC     | C15/C20 | 27564465 |
| 5AYP | C15  | TLC      | C15     | 8755734  |
| 5H9D | ≥C30 | TLC      | ≥C30    | 30730737 |
| 5XN6 | C20  | LC-MS/MS | C20     | 28607067 |
| 6G32 | C20  | HPLC     | C20     | 30275041 |
| 5ZE6 | ≥C30 | TLC      | ≥C30    | 30730737 |
| 5JFQ | C20  | GC-MS    | C20     | 30062607 |

## References

37. Shang, C.H.; Xu, X.L.; Yuan, Z.H.; Wang, Z.M.; Hu, L.; Alam, M.A.; Xie, J. Cloning and differential expression analysis of geranylgeranyl diphosphate synthase gene from *Dunaliella parva*. *J. Appl. Phycol.* 2016, 28, 2397–2405.
38. Qi, Q.; Li, R.; Gai, Y.; Jiang, X.N. Cloning and functional identification of farnesyl diphosphate synthase from *Pinus massoniana* Lamb. *J. Plant Biochem. Biot.* 2017, 26, 132–140.
39. Yang, L.E.; Huang, X.Q.; Lu, Q.Q.; Zhu, J.Y.; Lu, S. Cloning and characterization of the geranylgeranyl diphosphate synthase (GGPS) responsible for carotenoid biosynthesis in *Pyropia umbilicalis*. *J. Appl. Phycol.* 2016, 28, 671–678.
